# Supplementary material
Source: MDPI journal article supplement (https://www.mdpi.com/2076-3417/12/1/355)
Supplement: s1 [file s1]

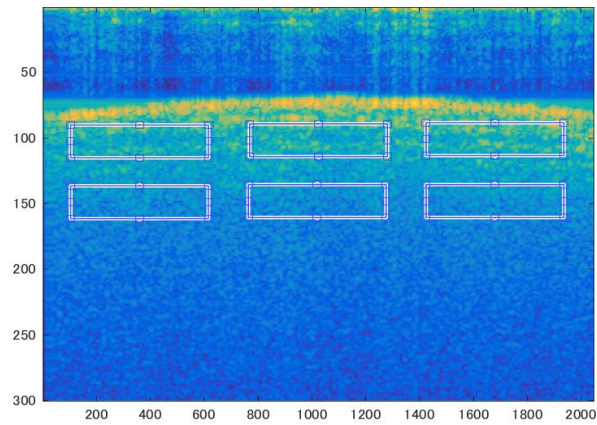

**Figure S1.** OCT structural image (x-z) scans with six regions of interest (ROI) indicated by rectangles. Each rectangle corresponds to 512 x 25 pixels. The average contrast of the ROIs was used to calculate the average across six seed to give the grand average.
